# Supplementary material for: Highly transparent polyurethane thermosets with tunable properties and enzymatic degradability derived from polyols originating from hemicellulosic sugars
Source: Royal Society of Chemistry journal article supplement (doi:10.1039/d3gc03302c), 2023-01-01
Supplement: d3gc03302c1.pdf [file d3gc03302c1.pdf]

Supporting information

**Highly transparent polyurethane thermosets with tunable properties and enzymatic degradability derived from polyols originating from hemicellulosic sugars**

*Nejib Kasmi,<sup>\*a</sup> Yosra Chebbi<sup>a</sup> Alessandra Lorenzetti,<sup>b</sup> Minna Hakkarainen<sup>\*a</sup>*

*<sup>a</sup>Department of Fibre and Polymer Technology, School of Engineering Sciences in Chemistry, Biotechnology and Health, KTH Royal Institute of Technology, Teknikringen 56-58, SE-100 44 Stockholm, Sweden*

*<sup>b</sup>Department of Industrial Engineering, Padova University, Via F. Marzolo 9, IT 35131 Padova, Italy*

\* Corresponding authors. [nejib@kth.se](mailto:nejib@kth.se), [minna@kth.se](mailto:minna@kth.se)

ORCID: Nejib Kasmi: [0000-0003-3805-3418](https://orcid.org/0000-0003-3805-3418), Minna Hakkarainen: [0000-0002-7790-8987](https://orcid.org/0000-0002-7790-8987)

This supporting information contains 14 pages with 11 Figures and 3 Tables.

|                                                                                                                                                                                                           |     |
|-----------------------------------------------------------------------------------------------------------------------------------------------------------------------------------------------------------|-----|
| <b>Figure S1.</b> Photos of the PU networks with different crosslinking degrees made from fully renewable polyols based on <i>A</i> ) 1,2,4-Butanetriol (BTO) and <i>B</i> ) 1,2,6-Hexanetriol (HTO)..... | S3  |
| <b>Figure S2.</b> FTIR spectra of partially and fully crosslinked PUs derived 100% from renewable-based branched polyols.....                                                                             | S4  |
| <b>Figure S3.</b> DSC thermograms of the PU thermosets with different degree of crosslinking derived from: <i>A</i> ) SucA/HTO polyol, <i>B</i> ) AdiA/HTO polyol, and <i>C</i> ) AzeA/HTO polyol.....    | S5  |
| <b>Table S1.</b> Quantities of branched polyol and HDI involved in the gram-scale synthesis of polyurethane thermosets.....                                                                               | S6  |
| <b>Table S2.</b> Thermal properties of purified the branched polyols and their corresponding polyurethane networks with different compositions.....                                                       | S7  |
| <b>Figure S4.</b> <i>A</i> ) and <i>B</i> ) Effect of the chain length of used triols (BTO and HTO), <i>C</i> ) Effect of diacid type into BTO-based polyols on the $T_g$ increase of PU networks.....    | S8  |
| <b>Figure S5.</b> TGA thermograms of the PU networks with different degree of crosslinking derived from: <i>A</i> ) SucA/BTO polyol, <i>B</i> ) AdiA/BTO polyol, and <i>C</i> ) AzeA/BTO polyol.....      | S9  |
| <b>Figure S6.</b> Effect of diacid type into branched polyols on the heat resistance of PU networks with different degree of crosslinking.....                                                            | S10 |
| <b>Figure S7.</b> Effect of the crosslinking degree of the prepared PU networks on their thermal stability ( $T_{d,5\%}$ ).....                                                                           | S11 |
| <b>Figure S8.</b> Comparison of tensile modulus of prepared polyurethane thermosets as a function of their crosslinking degrees.....                                                                      | S11 |
| <b>Table S3.</b> Mechanical parameters of the prepared polyurethane networks.....                                                                                                                         | S12 |
| <b>Figure S9.</b> Highly stretchable polyurethane samples with elastomeric behavior at room temperature: PU SucA/HTO 1/0.75 ( <i>left</i> ) and PU AdiA/BTO 1/0.75 ( <i>right</i> ).....                  | S12 |
| <b>Figure S10.</b> Photographs of fully crosslinked renewable polyurethane films.....                                                                                                                     | S13 |
| <b>Figure S11.</b> SEM micrographs of fully crosslinked polyurethane networks before (0 days) and after 30 days of enzymatic degradation.....                                                             | S14 |

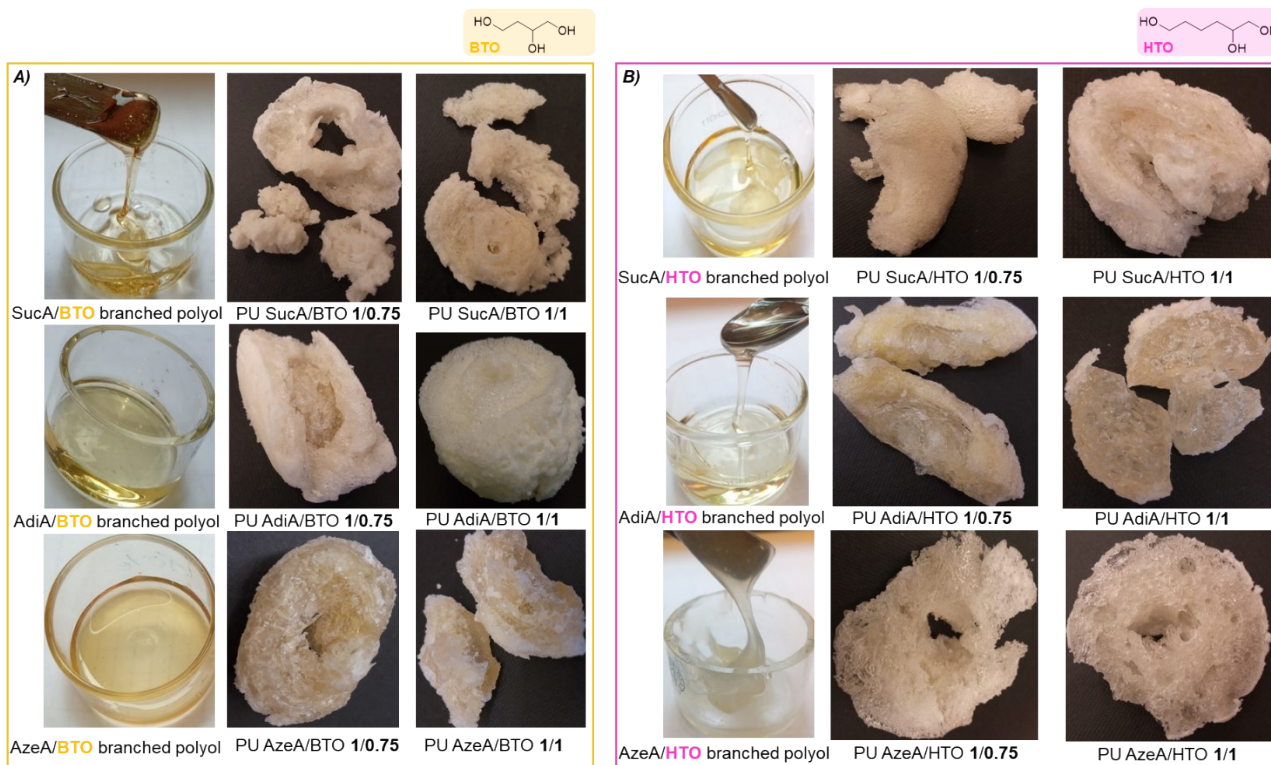

**Figure S1.** Photos of the PU networks with different crosslinking degrees made from fully renewable polyols based on *A)* 1,2,4-Butanetriol (BTO) and *B)* 1,2,6-Hexanetriol (HTO)

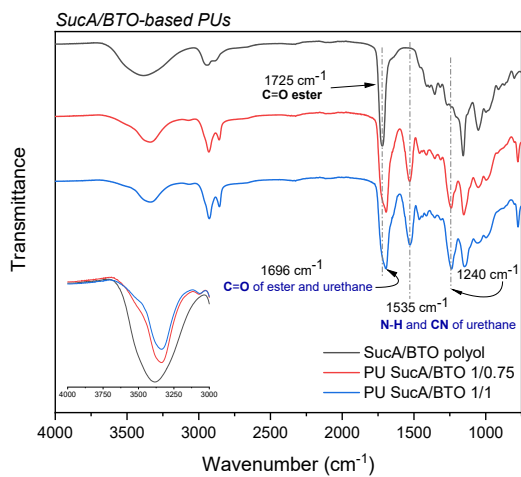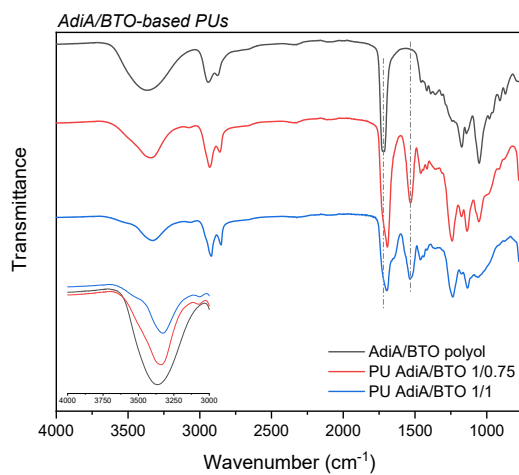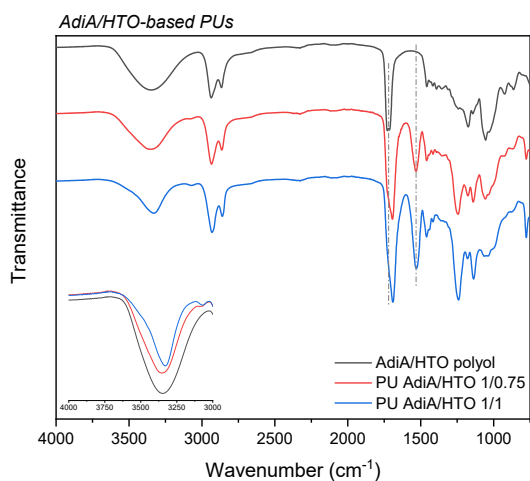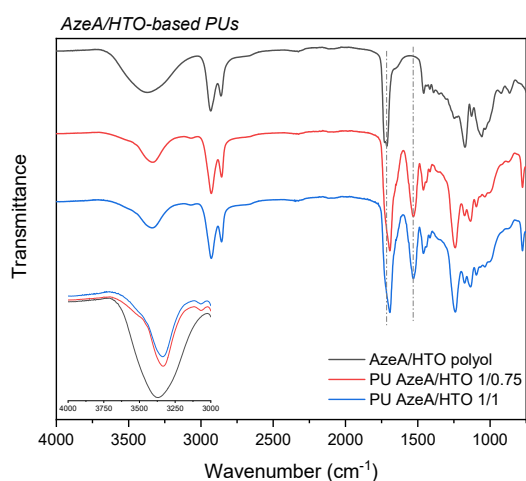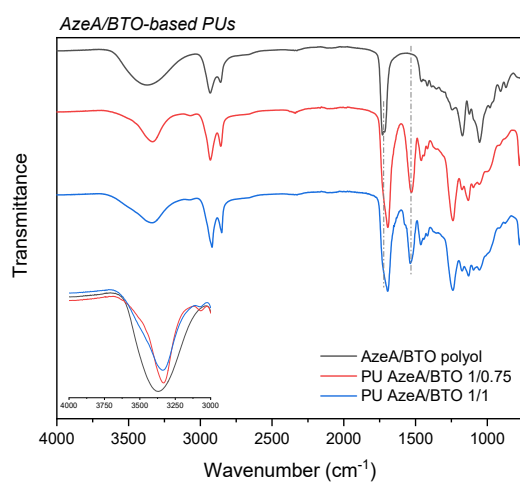

**Figure S2.** FTIR spectra of partially and fully crosslinked PUs derived 100% from renewable-based branched polyols

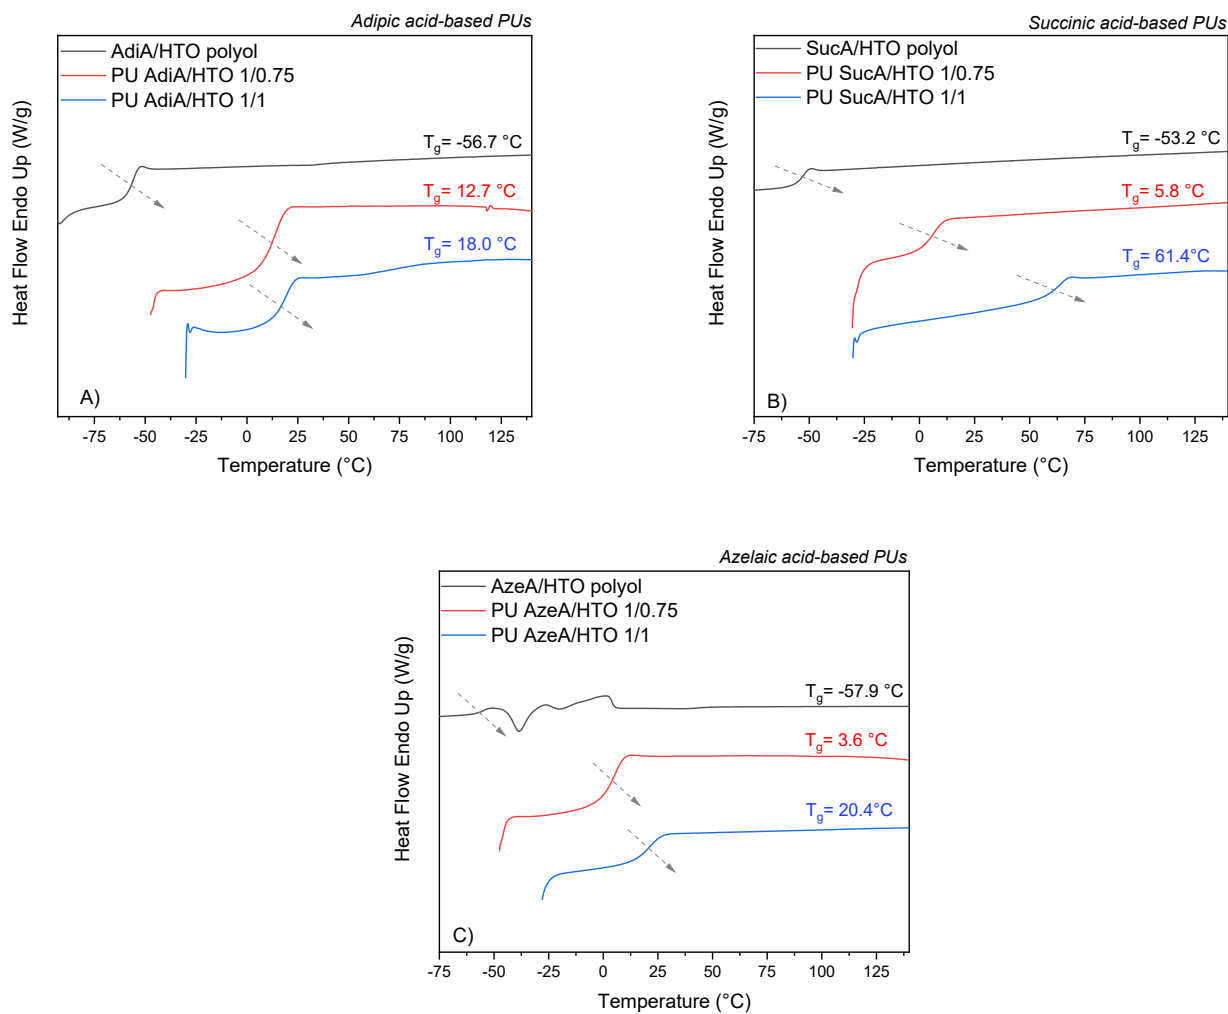

**Figure S3.** DSC thermograms of the PU thermosets with different degree of crosslinking derived from: *A)* SucA/HTO polyol, *B)* AdiA/HTO polyol, and *C)* AzeA/HTO polyol

**Table S1.** Quantities of branched polyol and HDI involved in the gram-scale synthesis of the new aliphatic PU thermosets

| <b>PU sample</b>   | <b>Amount of polyol (g)</b> | <b>Amount of HDI (g)</b> |
|--------------------|-----------------------------|--------------------------|
| PU SucA/BTO 1/0.75 | 5                           | 2.96                     |
| PU AdiA/BTO 1/0.75 | 5                           | 4.09                     |
| PU AzeA/BTO 1/0.75 | 5                           | 3.47                     |
| PU SucA/HTO 1/0.75 | 5                           | 3.13                     |
| PU AdiA/HTO 1/0.75 | 5                           | 4.60                     |
| PU AzeA/HTO 1/0.75 | 5                           | 2.82                     |
| PU SucA/BTO 1/1    | 5                           | 3.95                     |
| PU AdiA/BTO 1/1    | 5                           | 5.45                     |
| PU AzeA/BTO 1/1    | 5                           | 4.63                     |
| PU SucA/HTO 1/1    | 5                           | 4.18                     |
| PU AdiA/HTO 1/1    | 5                           | 6.13                     |
| PU AzeA/HTO 1/1    | 5                           | 3.76                     |

**Table S2.** Thermal properties of purified the branched polyols and their corresponding polyurethane networks with different compositions

| <b>Samples</b>     | <b>T<sub>g</sub> (°C)</b> | <b>T<sub>d,5%</sub></b> | <b>R<sub>500°C</sub> (%)</b> |
|--------------------|---------------------------|-------------------------|------------------------------|
| SucA/BTO polyol    | -18.6                     | 187.8                   | 4.1                          |
| PU SucA/BTO 1/0.75 | 10.9                      | 235.0                   | 6.1                          |
| PU SucA/BTO 1/1    | 70.4                      | 263.1                   | 4.5                          |
| AdiA/BTO polyol    | -52.1                     | 168.3                   | 4.3                          |
| PU AdiA/BTO 1/0.75 | 6.3                       | 247.0                   | 4.2                          |
| PU AdiA/BTO 1/1    | 45.1                      | 265.0                   | 4.9                          |
| AzeA/BTO polyol    | -57.2                     | 193.1                   | 1                            |
| PU AzeA/BTO 1/0.75 | 18.5                      | 267.8                   | 0.7                          |
| PU AzeA/BTO 1/1    | 23.5                      | 275.5                   | 1.2                          |
| SucA/HTO polyol    | -53.2                     | 179.3                   | 0.8                          |
| PU SucA/HTO 1/0.75 | 5.8                       | 244.0                   | 1.1                          |
| PU SucA/HTO 1/1    | 61.4                      | 264.6                   | 1.9                          |
| AdiA/HTO polyol    | -56.7                     | 226.3                   | 2.9                          |
| PU AdiA/HTO 1/0.75 | 12.7                      | 261.1                   | 0.5                          |
| PU AdiA/HTO 1/1    | 18.0                      | 270.5                   | 1.2                          |
| AzeA/HTO polyol    | -57.9                     | 236.7                   | 1.3                          |
| PU AzeA/HTO 1/0.75 | 3.6                       | 266.1                   | 0.8                          |
| PU AzeA/HTO 1/1    | 20.4                      | 273.6                   | 1.7                          |

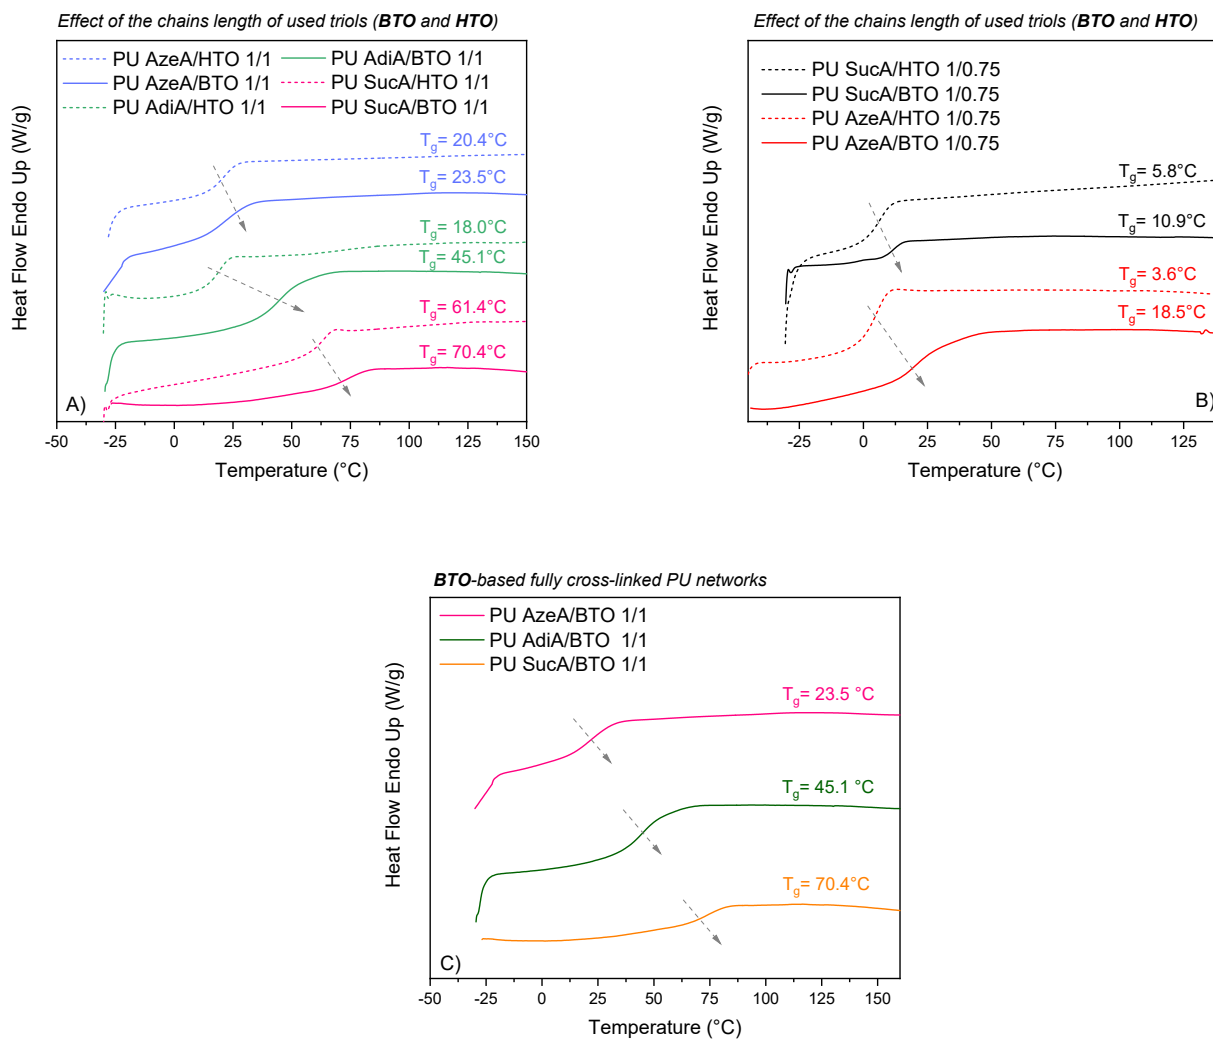

**Figure S4.** A) and B) Effect of the chain length of used triols (BTO and HTO), C) Effect of diacid type into BTO-based polyols on the  $T_g$  increase of PU networks



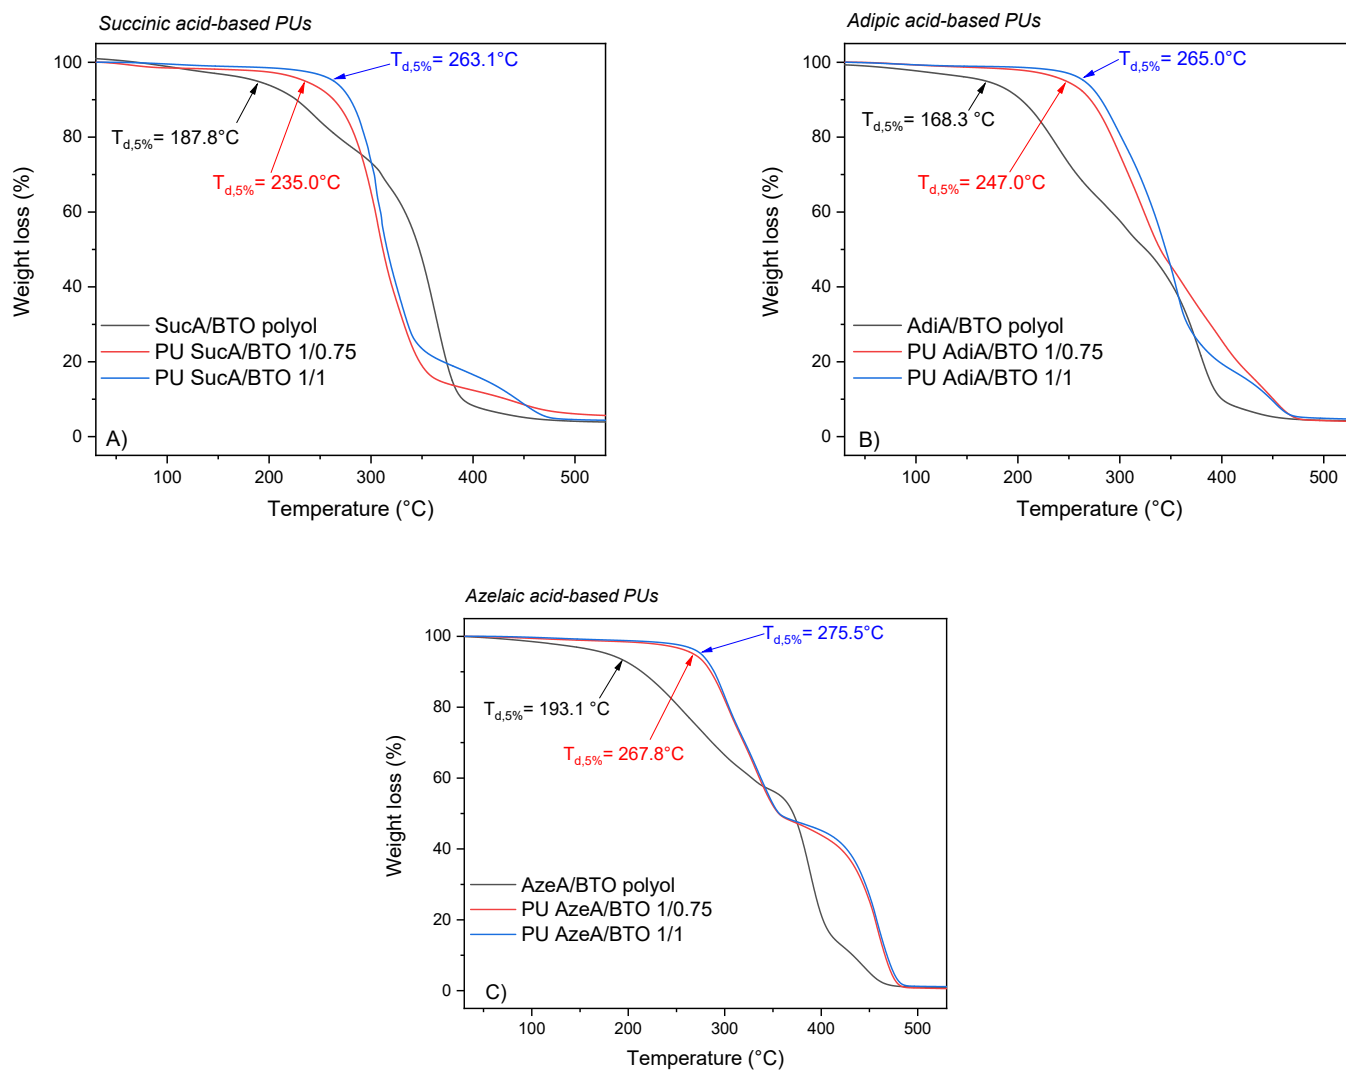

**Figure S5.** TGA thermograms of the PU networks with different degree of crosslinking derived from: *A)* SucA/BTO polyol, *B)* AdiA/BTO polyol, and *C)* AzeA/BTO polyol

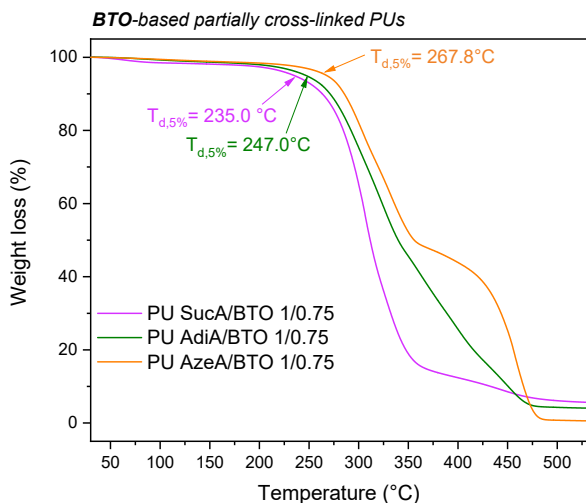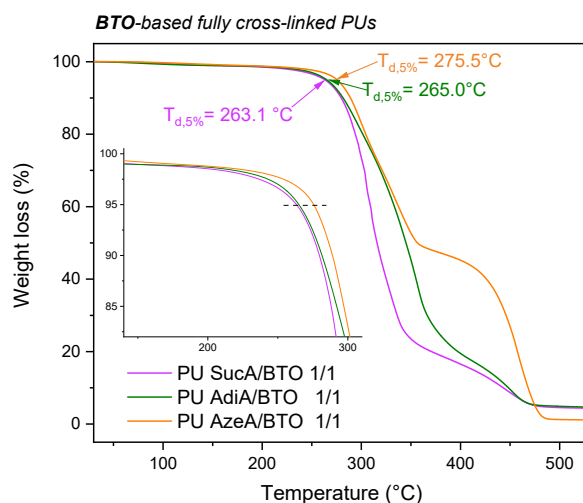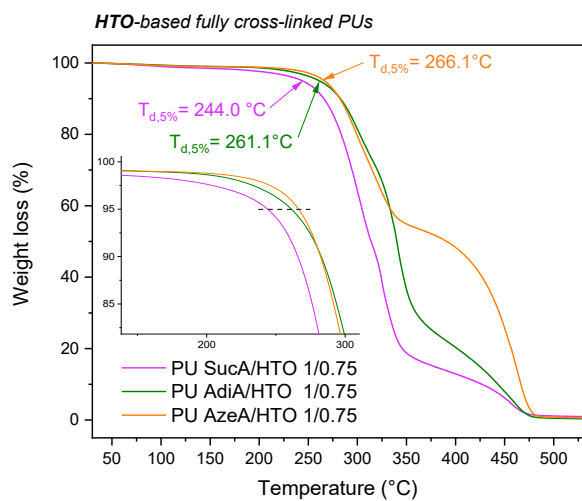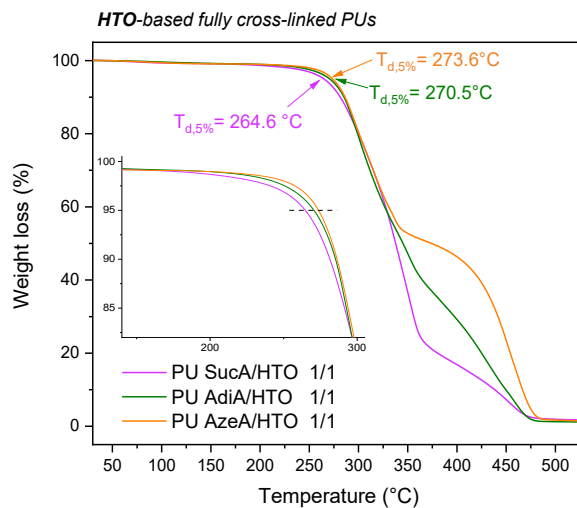

**Figure S6.** Effect of diacid type into branched polyols on the heat resistance of PU networks with different degree of crosslinking

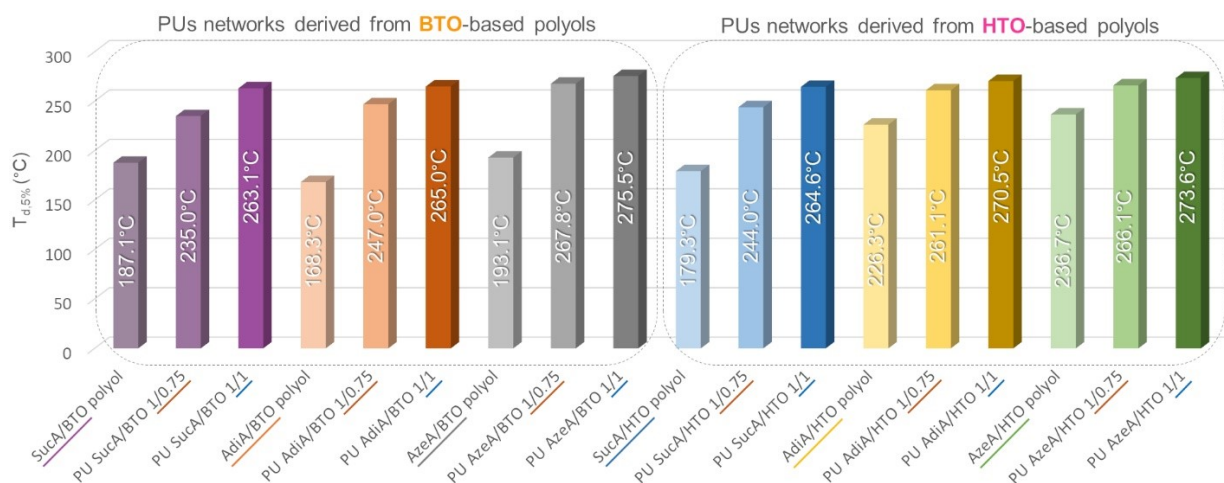

**Figure S7.** Effect of the crosslinking degree of the prepared PU networks on their thermal stability ( $T_{d,5\%}$ )

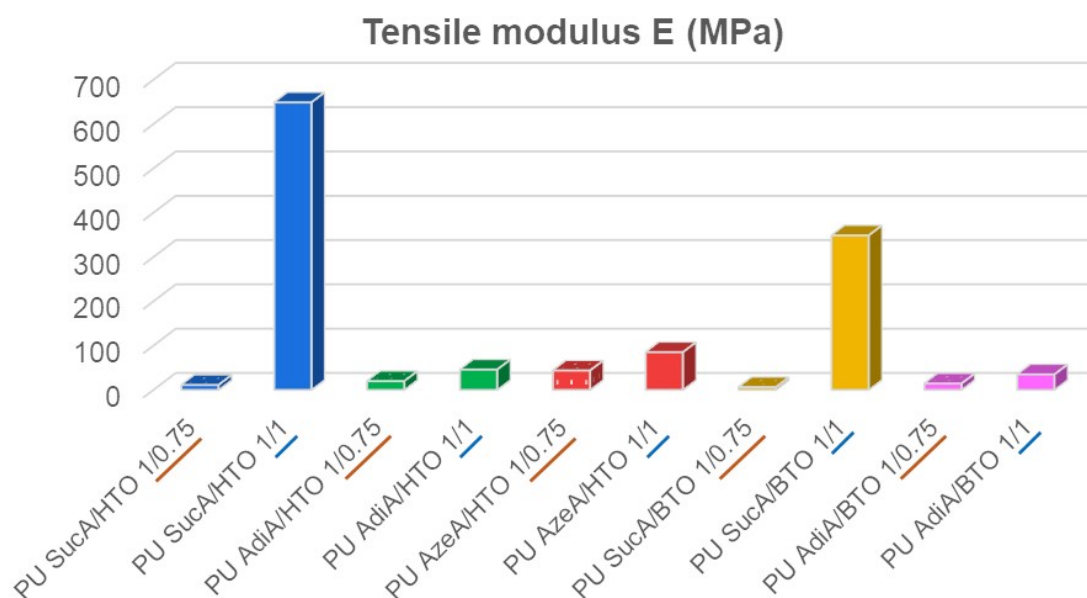

**Figure S8.** Comparison of tensile modulus of prepared polyurethane thermosets as a function of their crosslinking degrees

**Table S3.** Mechanical parameters of the prepared polyurethane networks

| PU networks        | Tensile modulus $E$<br>(MPa) | Tensile strength $\sigma$<br>(MPa) | Elongation at<br>break $\varepsilon$ (%) |
|--------------------|------------------------------|------------------------------------|------------------------------------------|
| PU SucA/HTO 1/1    | $648.8 \pm 100.9$            | $31.1 \pm 3.05$                    | $22 \pm 3.8$                             |
| PU SucA/HTO 1/0.75 | $11.2 \pm 0.14$              | $9.0 \pm 1.22$                     | $188 \pm 7.3$                            |
| PU AdiA/HTO 1/1    | $45.8 \pm 0.1$               | $14.9 \pm 0.7$                     | $52 \pm 1.5$                             |
| PU AdiA/HTO 1/0.75 | $19.9 \pm 2.0$               | $7.6 \pm 0.4$                      | $58 \pm 0.9$                             |
| PU AzeA/HTO 1/1    | $85.2 \pm 5.1$               | $26.2 \pm 0.2$                     | $52 \pm 4.7$                             |
| PU AzeA/HTO 1/0.75 | $43.7 \pm 0.8$               | $12.1 \pm 1.5$                     | $62 \pm 7.9$                             |
| PU SucA/BTO 1/1    | $348.6 \pm 78$               | $25.9 \pm 1.5$                     | $15 \pm 1.5$                             |
| PU SucA/BTO 1/0.75 | $6.1 \pm 0.2$                | $3.3 \pm 0.04$                     | $74 \pm 1.5$                             |
| PU AdiA/BTO 1/1    | $34.9 \pm 7.2$               | $24.1 \pm 2.2$                     | $130 \pm 4.4$                            |
| PU AdiA/BTO 1/0.75 | $14.4 \pm 0.7$               | $9.1 \pm 1.3$                      | $170 \pm 16.8$                           |
| PU AzeA/BTO 1/1    | $56.0 \pm 9.2$               | $15.0 \pm 2.2$                     | $38 \pm 0.5$                             |
| PU AzeA/BTO 1/0.75 | $84.9 \pm 2.5$               | $18.3 \pm 2.9$                     | $44 \pm 0.2$                             |

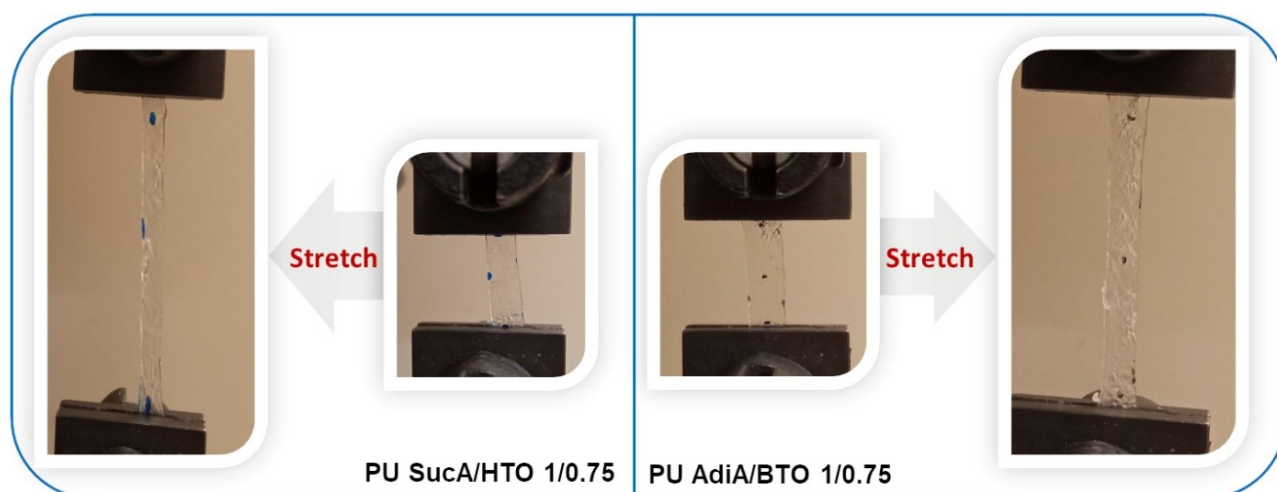**Figure S9.** Highly stretchable polyurethane samples with elastomeric behavior at room temperature: PU SucA/HTO 1/0.75 (*left*) and PU AdiA/BTO 1/0.75 (*right*)

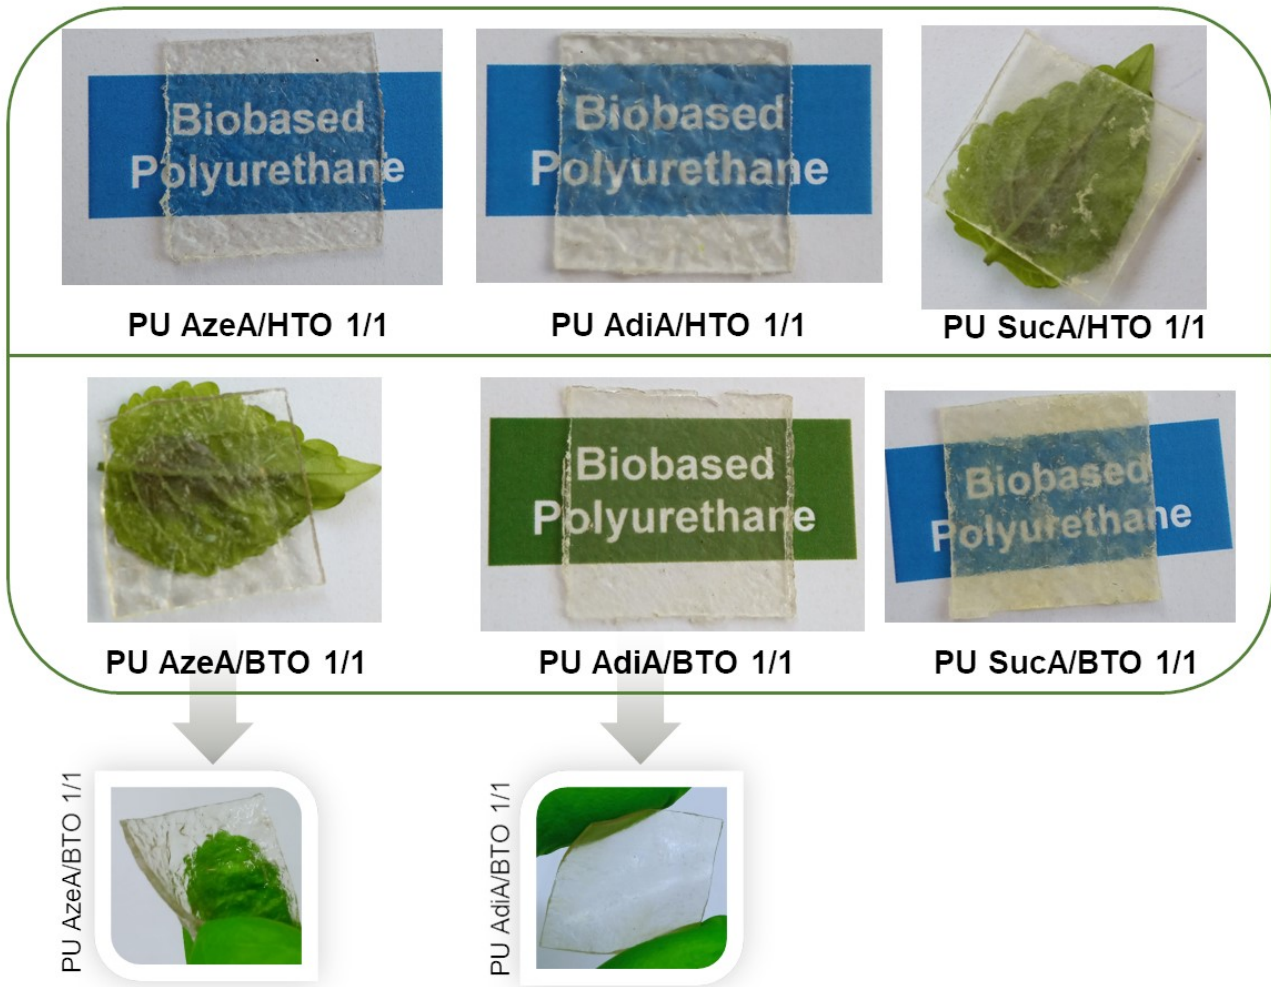

**Figure S10.** Photographs of fully crosslinked renewable polyurethane films

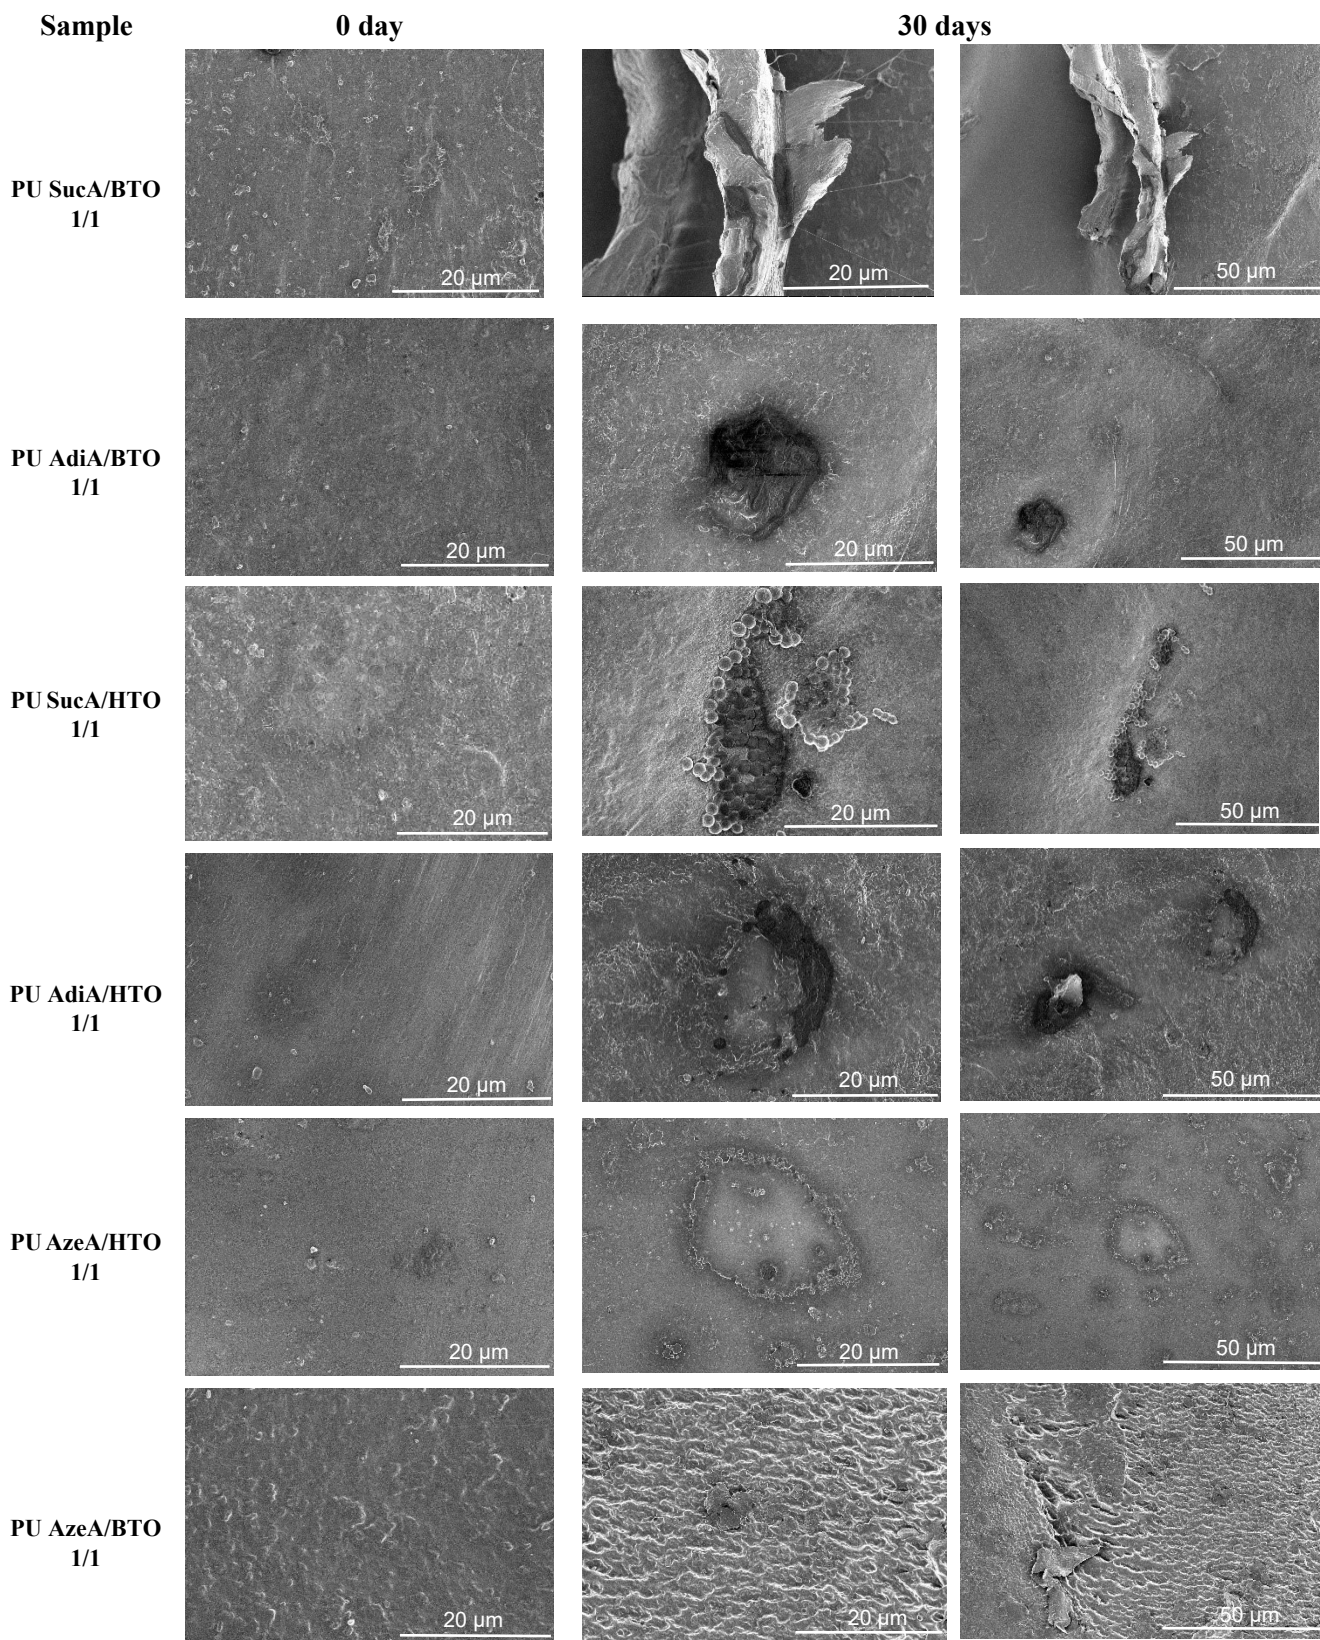

**Figure S11.** SEM micrographs of fully crosslinked polyurethane networks before (0 days) and after 30 days of enzymatic degradation
